# Supplementary material
Source: MDPI journal article supplement (https://www.mdpi.com/2673-4583/5/1/34)
Supplement: s1 [file s1]

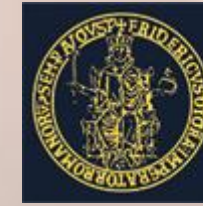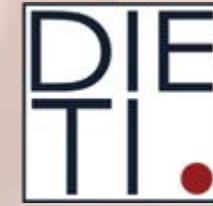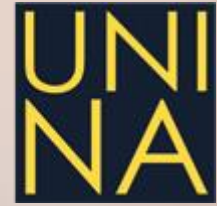

# Plasmonic hydrogel nanocomposites with combined optical and mechanical properties for biochemical sensing

***B. Miranda<sup>1,2,\*</sup>, R. Moretta<sup>1</sup>, S. De Martino<sup>3</sup>, P. Dardano<sup>1</sup>, I. Rea<sup>1</sup>, C. Forestiere<sup>2</sup>, L. De Stefano<sup>1</sup>***

*<sup>1</sup> Institute of Applied Sciences and Intelligent Systems, via P. Castellino 111, Naples, 80131, Italy*

*<sup>2</sup> DIETI, University of Naples “Federico II”, via Claudio 21, Naples, 80125 Italy*

*<sup>3</sup> Materias s.r.l., via N. Protopisani 50, Naples, 80131, Italy*

*\*bruno.miranda@na.isasi.cnr.it*

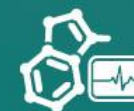

# Outline

- Localized Surface Plasmon Resonance and Metal-Enhanced Fluorescence
- Plasmonic Hydrogels: Design and Optical Characterization
- Dual-Sensing of Streptavidin in PEGDA 10kDa as a Proof of Concept
- Conclusions and Future Perspectives

# Outline

- **Localized Surface Plasmon Resonance and Metal-Enhanced Fluorescence**
- Plasmonic Hydrogels: Design and Optical Characterization
- Dual-Sensing of Streptavidin in PEGDA 10kDa as a Proof of Concept
- Conclusions and Future Perspectives

# Introduction: LSP Resonance

- *Plasmon*: oscillation of electron density with respect to the fixed positive ions in a metal.
- **Localized surface plasmon resonance (LSPR)**: a size and shape-dependent coherent oscillation of the conduction electrons of a noble metal nanoparticle ( $d \ll \lambda$ ).
- LSPRs exhibit strong field enhancement in the surroundings of the nanoparticles, which makes their resonance locally sensitive to refractive index variations.

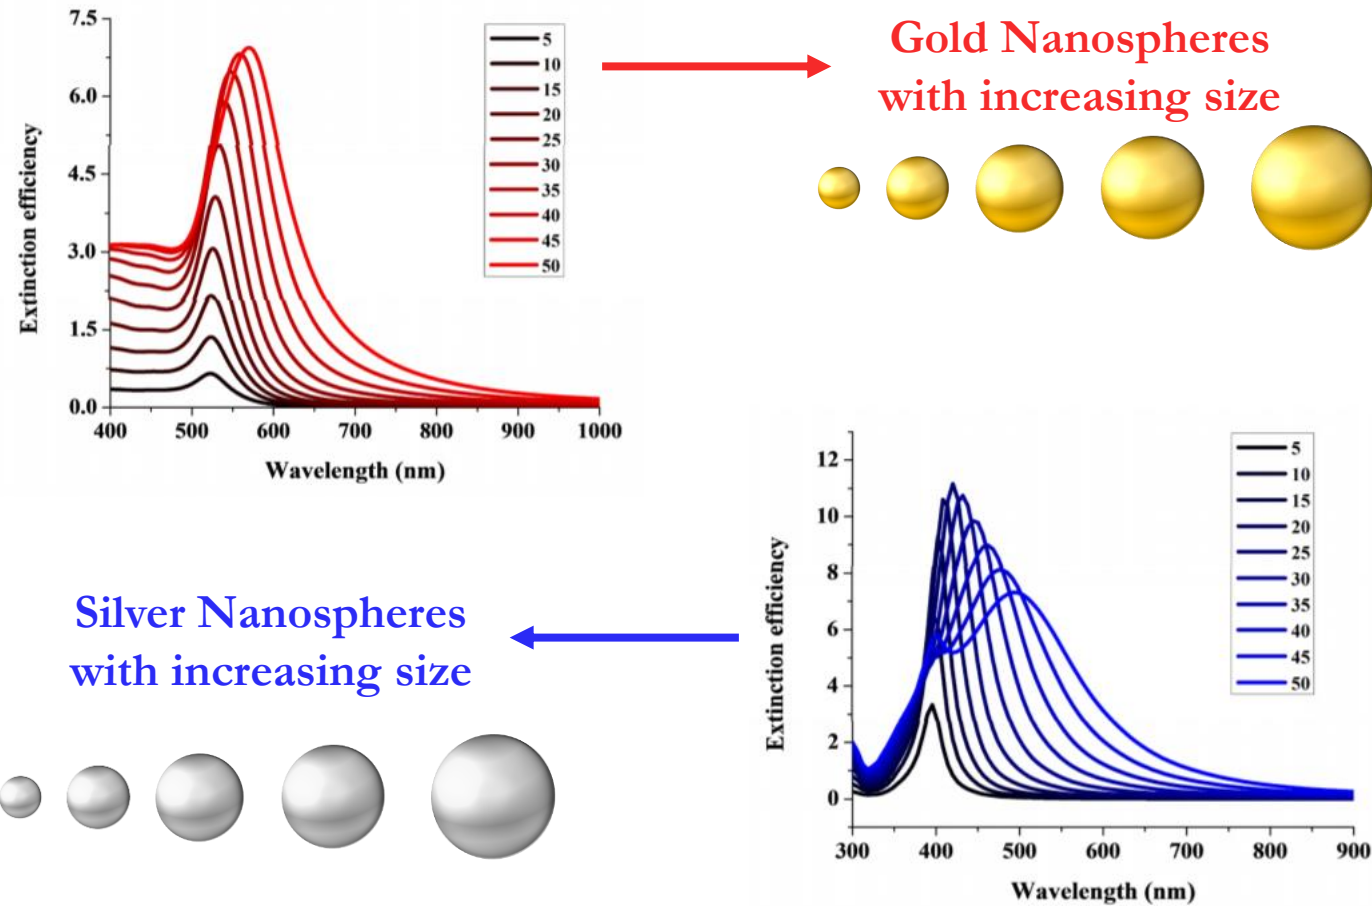

S.Maier, Plasmonics: Fundamentals and Application. Springer, 2007;  
B. Sepùlveda *et al.*, Nano Today, 2009  
Farooq, S. and de Araujo, R.E, Open Journal of Applied Sciences, 2018.

# Introduction: Metal-Enhanced Fluorescence

- *Metal-Enhanced Fluorescence* is a phenomenon dependent on:
  - the spectral overlap between a fluorescent dye and the plasmon absorbance
  - the fluorophore-nanostructure distance  $z$ .
- Förster resonance energy transfer (FRET) mechanism
- Purcell effect mechanism
- Dual-mechanism

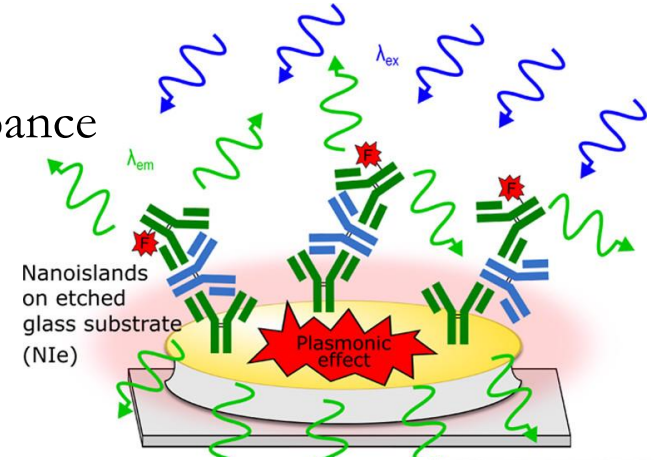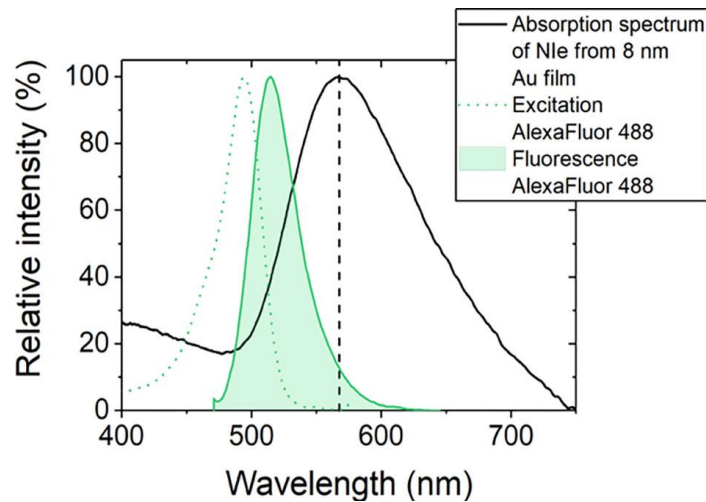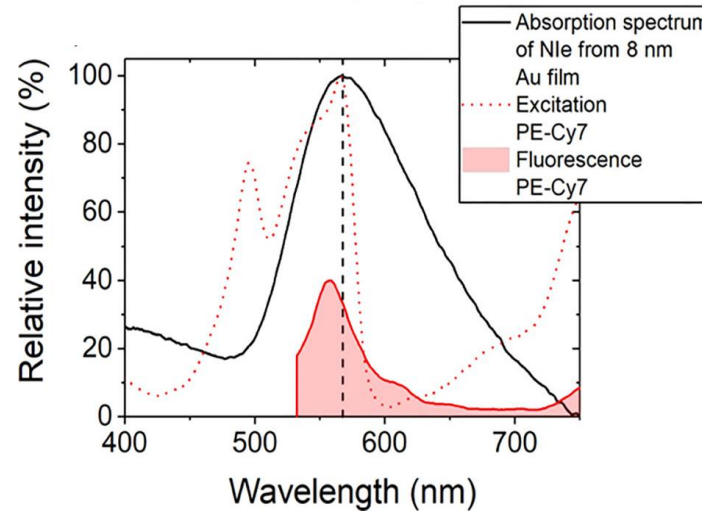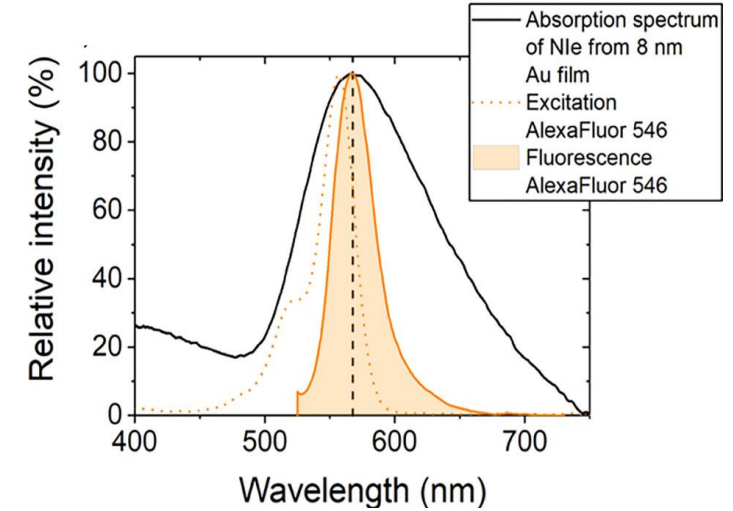

B. Miranda *et al.*, ACS Applied Nano Materials, 2020

A. Minopoli *et al.*, Nature Communications, 2021

# Introduction: Flexible Plasmonic Nanocomposites

**“Flexible Plasmonic Nanocomposites”**: plasmonic nanoparticles impregnated over/in flexible solid substrates.

## Advantages:

- ✓ Cost-Effectiveness
- ✓ High Processability
- ✓ Adaptable to non-planar substrates
- ✓ *In-situ/In-vivo* collection of the samples
- ✓ Easy integration into more complex systems

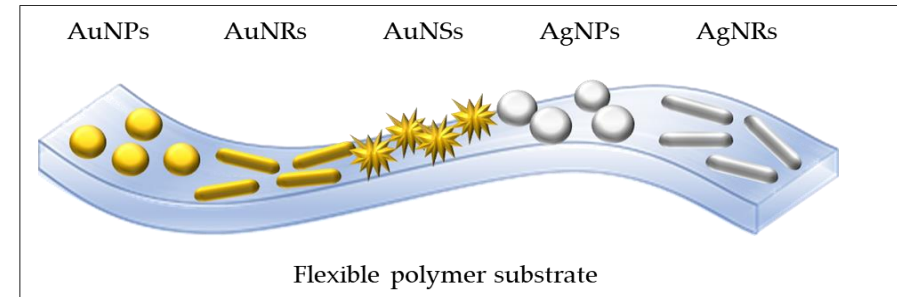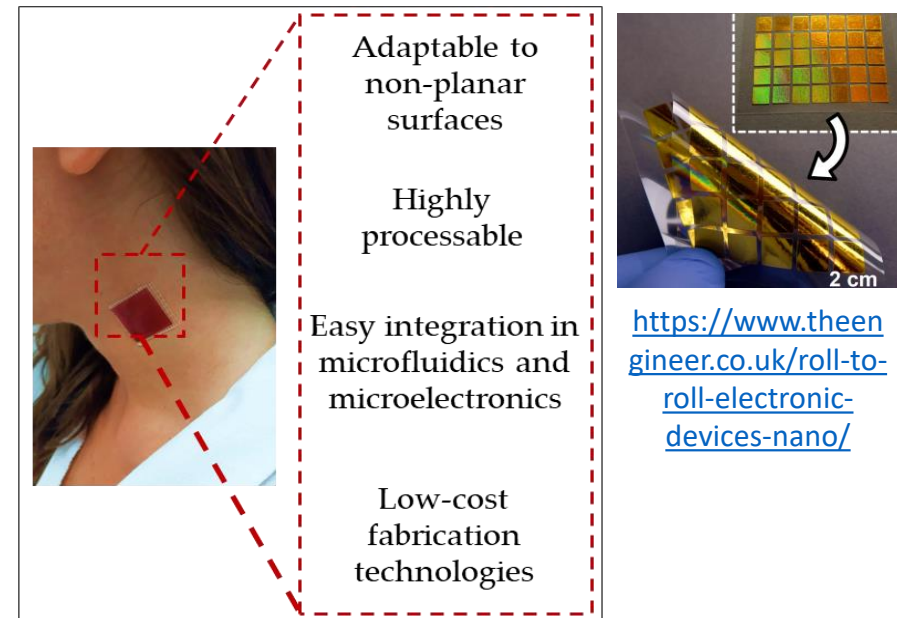

Polavarapu *et al.*, Physical Chemistry Chemical Physics, 2013  
B. Miranda *et al.*, Biosensors, *under review*, 2021

# Outline

- Localized Surface Plasmon Resonance and Metal-Enhanced Fluorescence
- **Plasmonic Hydrogels: Design and Optical Characterization**
- Dual-Sensing of Streptavidin in PEGDA 10kDa as a Proof of Concept
- Conclusions and Future Perspectives

# Plasmonic Hydrogels: Fabrication

## Hydrogels for miniaturized 3D biosensors

- ✓ Biorecognition elements are adhered onto a 3D architecture

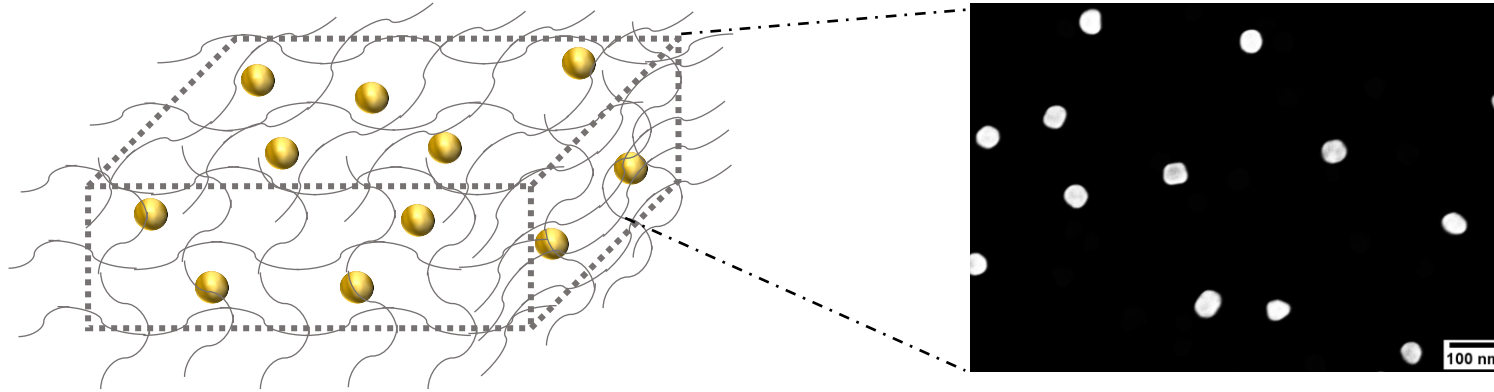

## Polyethylene glycol diacrylate (PEGDA)

- ✓ Excellent matrices for the entrapment of biomolecules
- ✓ Non-fouling material (useful for complex solutions)
- ✓ Tunable micropatterning with photolithographic techniques.
- ✓ Tunable network in terms of mesh size and crosslinking

## Colloidal citrate gold nanoparticles (Au-NPs)

- ✓ Tunable in size and shape
- ✓ Many surface chemistry protocols have been optimized

Pedrosa et al., *Electroanalysis*, 2011; Love et al., *Chemical Reviews*, 2005;  
Rebelo et al., *Biosensors and Bioelectronics*, 2019;  
B. Miranda *et al.*, *Journal of Applied Physics*, 2021.



# Plasmonic hydrogels: Fabrication and Characterization

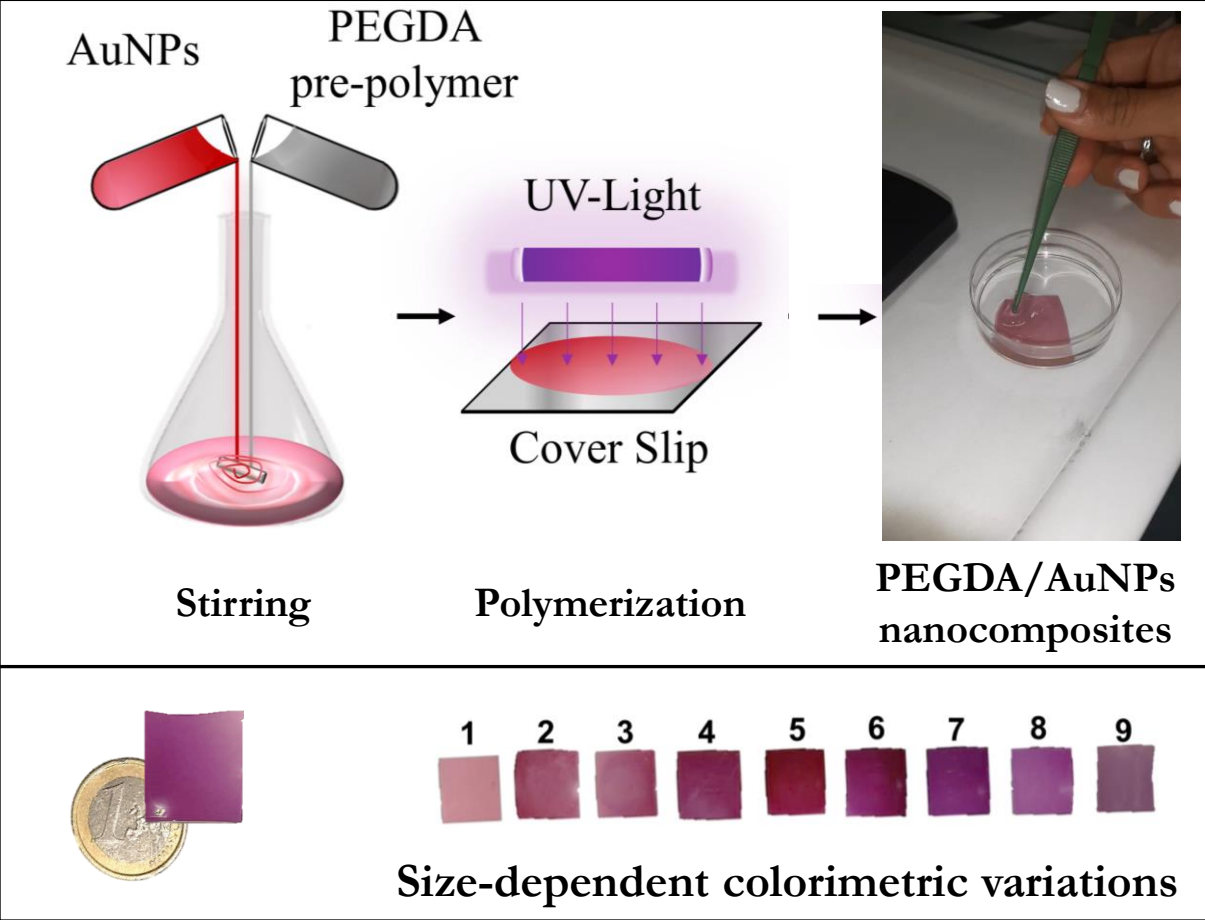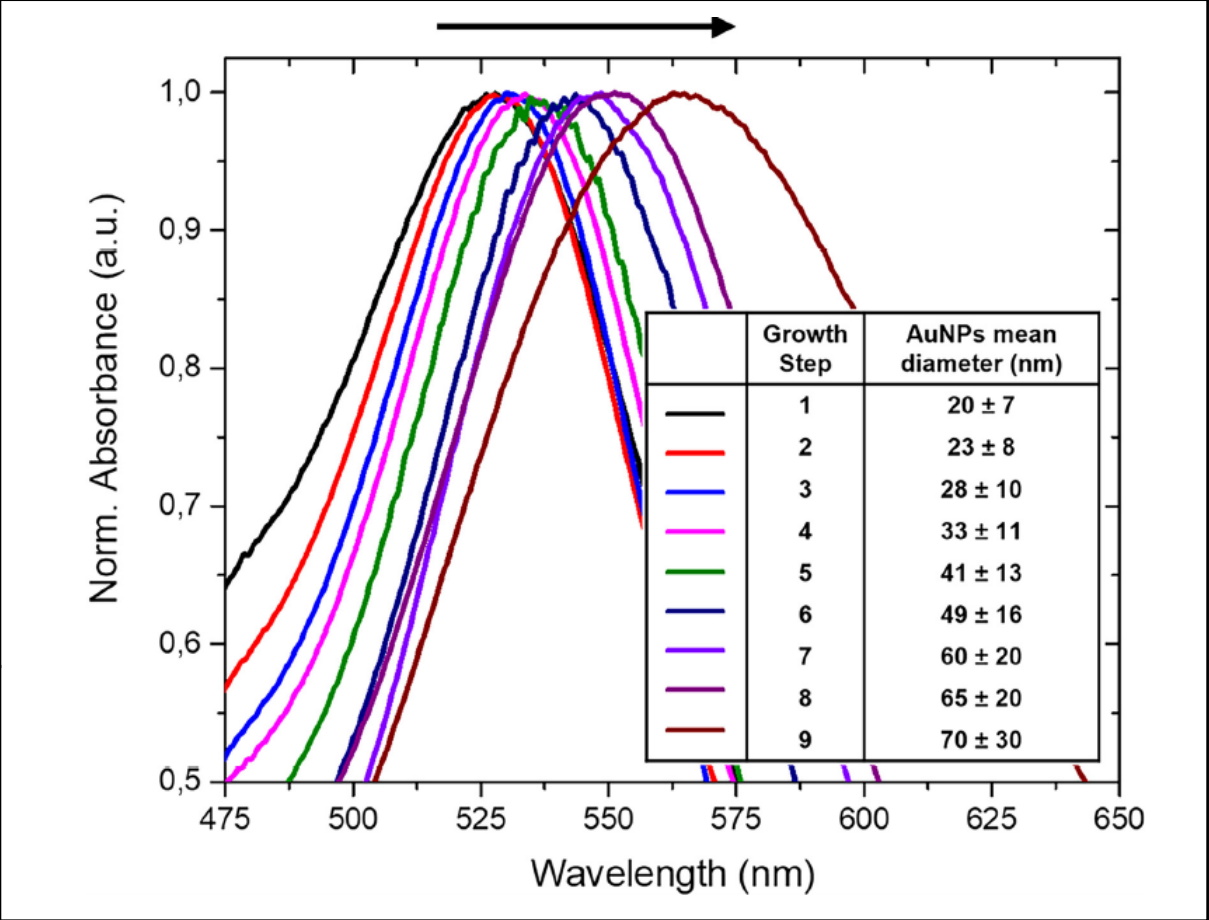

B. Miranda *et al.*, 2020 Italian Conference on Optics and Photonics (ICOP), Parma, Italy, IEEE Xplore, 2020  
 B. Miranda *et al.*, Journal of Applied Physics, 2021

# Plasmonic Hydrogels: Functionalization

LSPR measurements are used to monitor the functionalization steps.

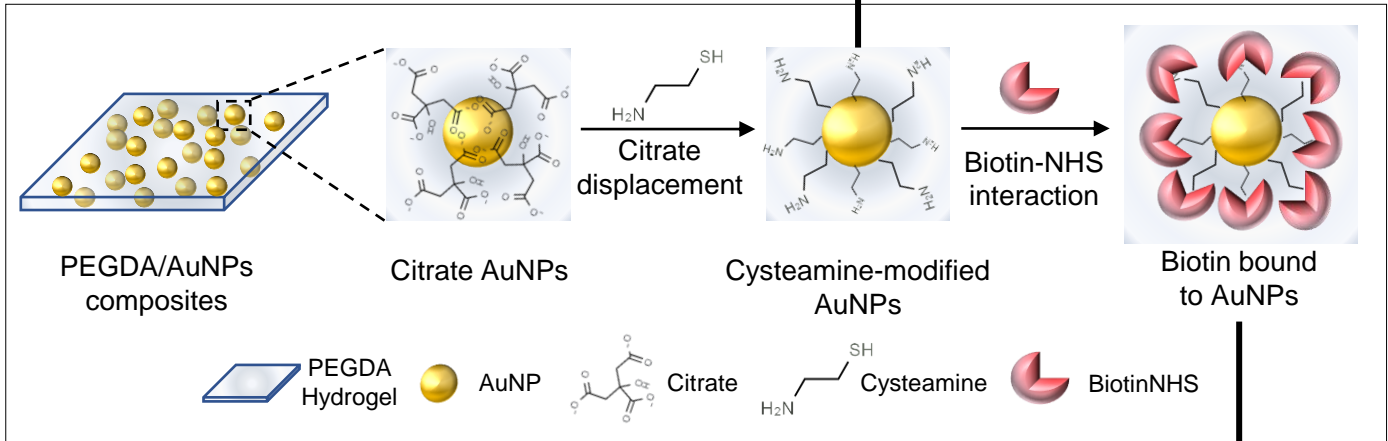

A Bio-responsive hydrogel is obtained by functionalizing gold nanoparticles within the hydrogel with a biorecognition element.

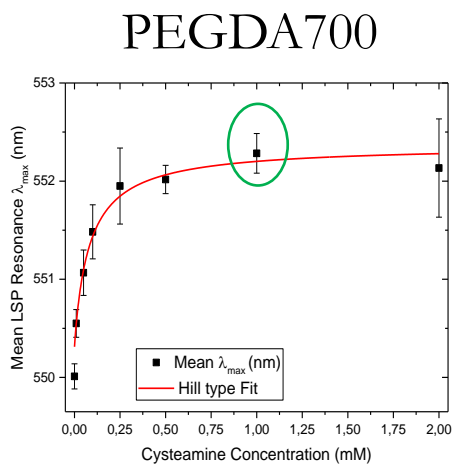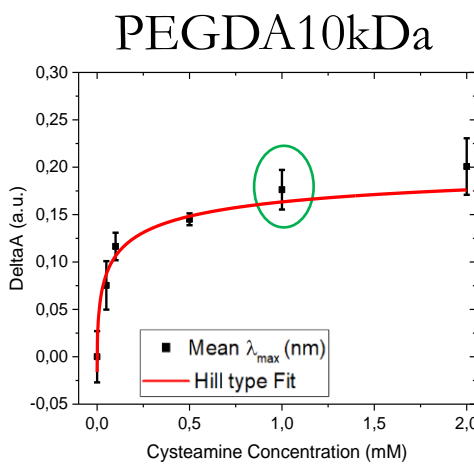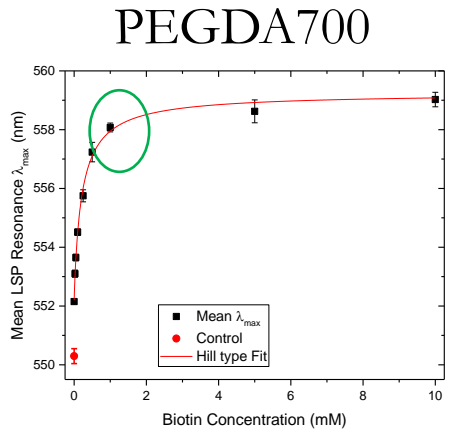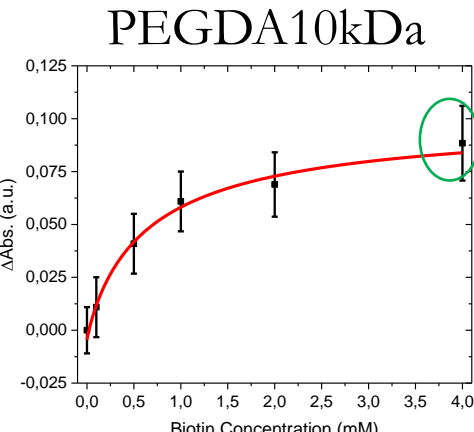

# Outline

- Localized Surface Plasmon Resonance and Metal-Enhanced Fluorescence
- Plasmonic Hydrogels: Design and Optical Characterization
- **Dual-Sensing of Streptavidin in PEGDA 10kDa as a Proof of Concept**
- Conclusions and Future Perspectives

# LSPR sensing of Streptavidin

Streptavidin was incubated in PEGDA/AuNPs nanocomposites in the same conditions to evaluate plasmon decoupling as a function of the target concentration.

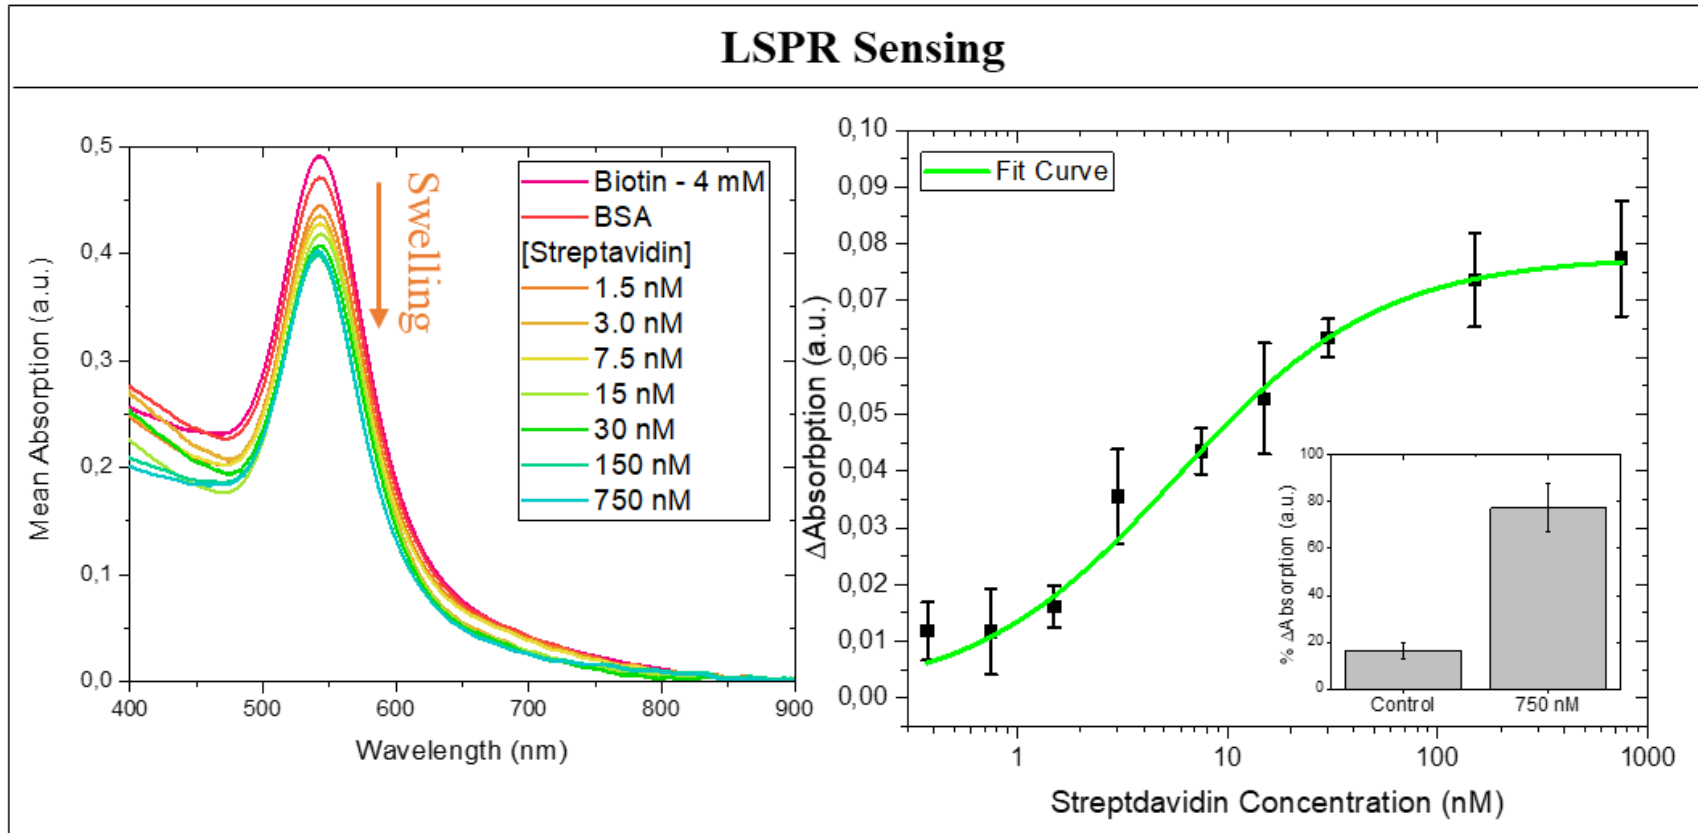

# Fluorescence-Enhancement Evaluation

Fluorescent Streptavidin–cy3<sup>TM</sup> (100 nM) was incubated in PEGDA hydrogels and PEGDA/AuNPs nanocomposites in the same conditions to allow the computation of the Fluorescence Enhancement (FE).

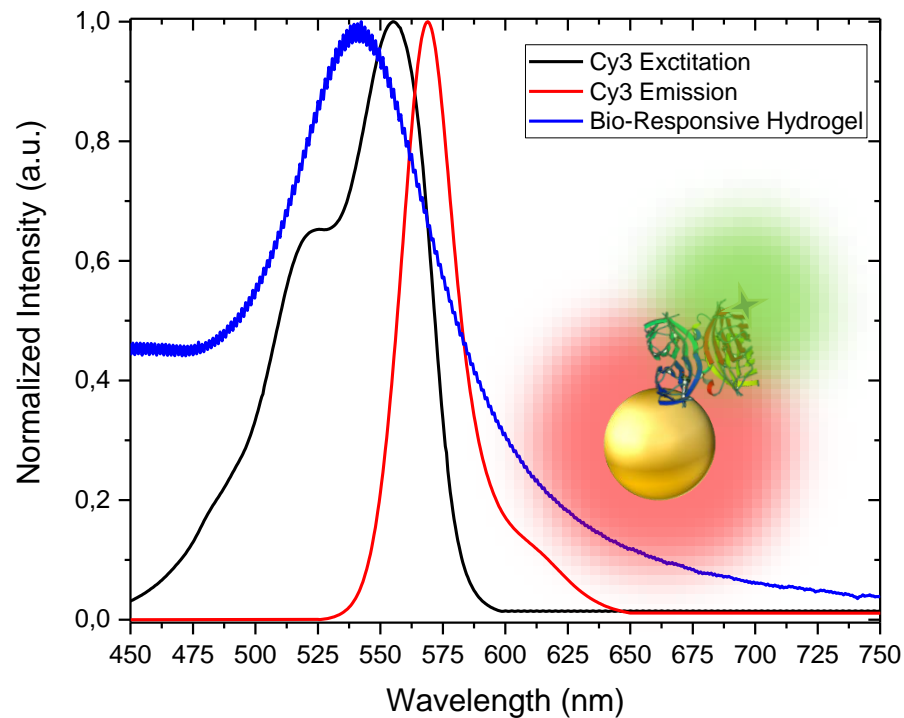

| PEGDA – Streptavidin–cy3 <sup>TM</sup>                                               | PEGDA/AuNPs – Streptavidin–cy3 <sup>TM</sup>                                         |
|--------------------------------------------------------------------------------------|--------------------------------------------------------------------------------------|
| 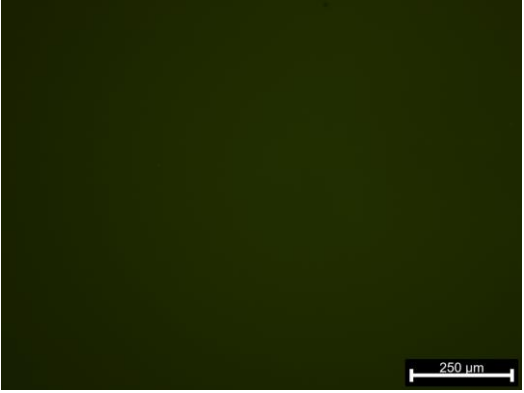  |   |
| PEGDA – Background                                                                   | PEGDA/AuNPs – Background                                                             |
|  |  |

# 3D MEF Biosensor: Streptavidin Sensing

Bio-responsive PEGDA/AuNPs nanocomposites functionalized with Biotin with Streptavidin- cy3<sup>TM</sup>.

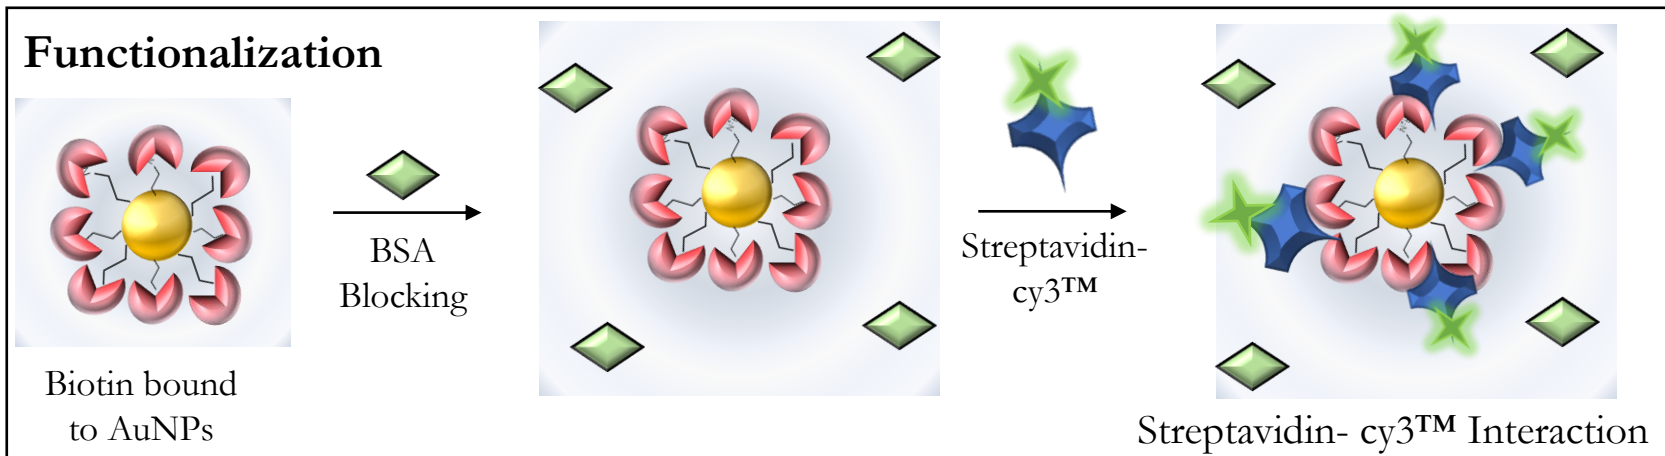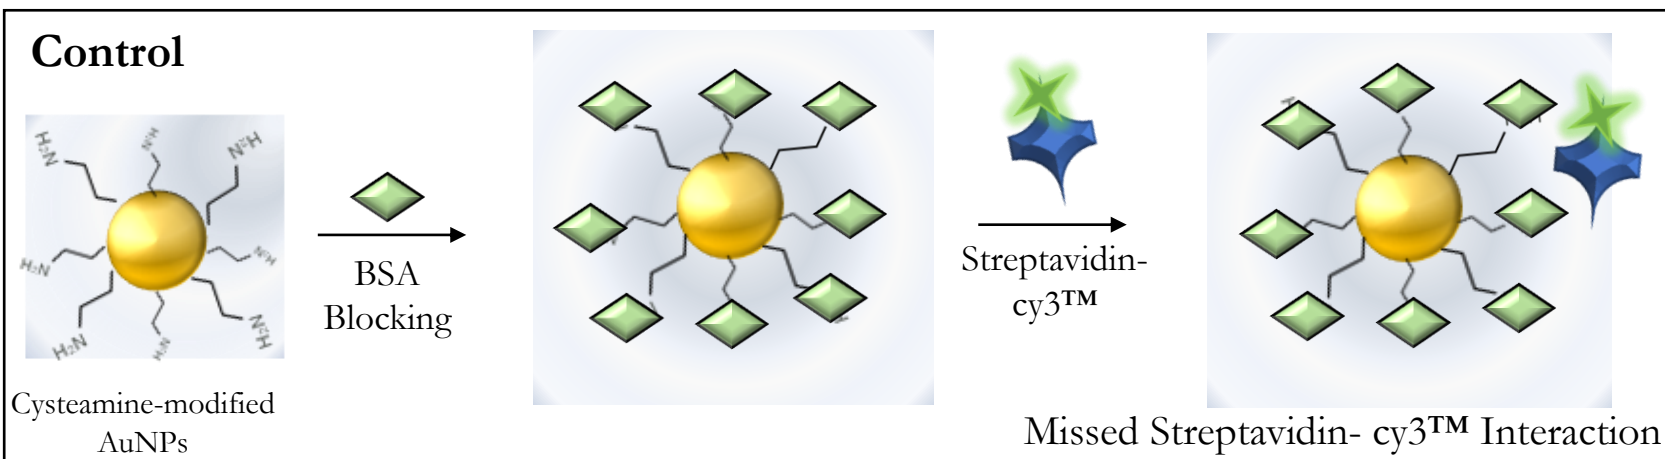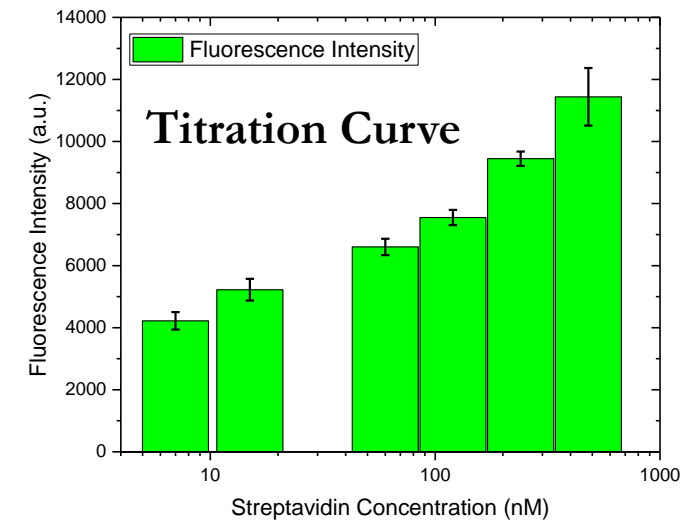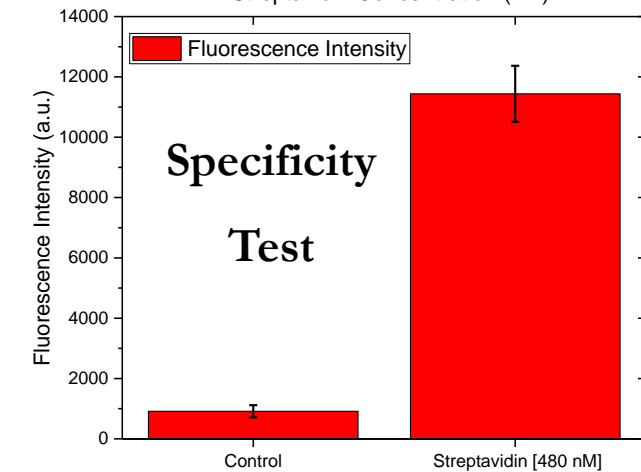

# Outline

- Localized Surface Plasmon Resonance and Metal-Enhanced Fluorescence
- Plasmonic Hydrogels: Design and Optical Characterization
- Dual-Sensing of Streptavidin in PEGDA 10kDa as a Proof of Concept
- **Conclusions and Future Perspectives**

# Conclusions and Future Perspectives

## Achievements

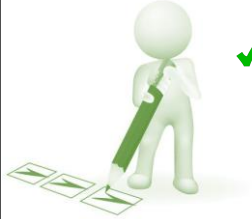

✓ Evaluation of Fluorescence enhancement by MEF - dual mechanism in 3D-bioresponsive hydrogels.

- ✓ Optimization of the functionalization scheme.
- ✓ Chemical modification of the AuNPs surfaces within the hydrogel and sensing of the fluorescent streptavidin.

## To Do List

To Do List

- 1.
- 2.
- 3.

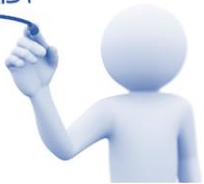

! Study of the swelling effect on the re-arrangement of nanoparticles within the 3D network.

## Work in Progress

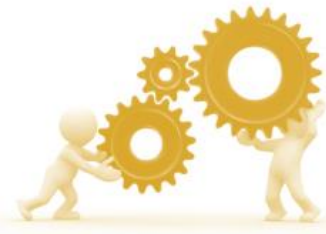

- Combination of the designed 3D bio-responsive hydrogels with miniaturized LED and spectrometer as portable device (POCT).
- Fabrication of nanocomposites embedding differently shaped nanoparticles (gold nanostars).

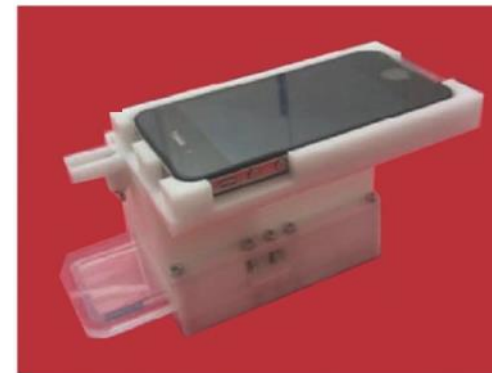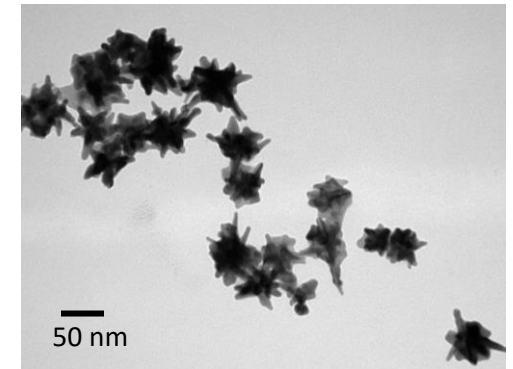



**Thank you for your  
kind attention**

**Dr. Luca De Stefano**, Research Director  
**Dr. Principia Dardano**, Researcher  
**Dr. Ilaria Rea**, Researcher  
**Dr. Mario Battisti**, Researcher  
**Dr. Selene De Martino**, Researcher  
**Dr. Rosalba Moretta**, Researcher  
**Chiara Tramontano**, PhD Student  
**Chiara Tamarro**, PhD Student  
**Giovanna Chianese**, Research Fellowship

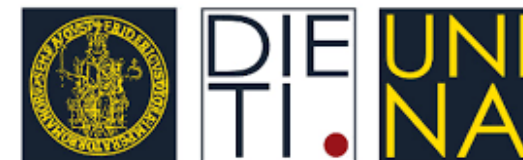

**Carlo Forestiere**, Associate Professor

*Bruno Miranda, [bruno.miranda@na.isasi.cnr.it](mailto:bruno.miranda@na.isasi.cnr.it)*

*Plasmonic hydrogel nanocomposites with combined optical and mechanical properties for biochemical sensing*
